# Supplementary figures and images for: A dynamin 1-, dynamin 3- and clathrin-independent pathway of synaptic vesicle recycling mediated by bulk endocytosis
Source: eLife journal article supplement (doi:10.7554/elife.01621), 2014-06-24

## Supplement 1

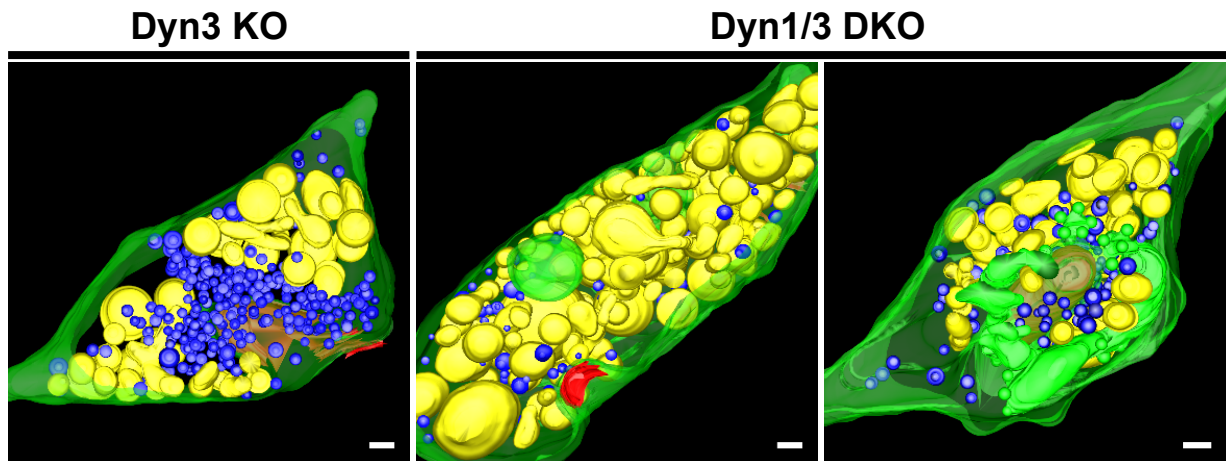

Supplement: supp [file elife-01621-supp-v1.zip]
